# Supplementary material for: A graphene/Janus B2P6 heterostructure with a controllable Schottky barrier via interlayer distance and electric field
Source: Royal Society of Chemistry journal article supplement (doi:10.1039/d3cp03732k), 2023-01-01
Supplement: d3cp03732k1.pdf [file d3cp03732k1.pdf]

## Electronic Supplementary Information (ESI)

### Graphene/Janus $B_2P_6$ heterostructure with controllable Schottky barrier via interlayer distance and electric field

Tian Xie,<sup>a</sup> Xinguo Ma,<sup>\*ac</sup> Youyou Guo,<sup>a</sup> Gang Yuan,<sup>a</sup> Nan Ma<sup>b</sup> and Chuyun Huang<sup>\*c</sup>

<sup>a</sup> School of Science, Hubei University of Technology, Wuhan 430068, China;

<sup>b</sup> Key Laboratory of Inorganic Functional Materials and Devices, Chinese Academy of Sciences, Shanghai 201899, China;

<sup>c</sup> 111 Research Center, Hubei University of Technology, Wuhan 430068, China

**\*Corresponding Authors, E-mail:** maxg@hbut.edu.cn (X. Ma); chuyunh@163.com

**Table S1.** The fractional coordinates parameters of monolayer  $B_2P_6$  using GGA-PBE.

| fractional coordinates | atom           |                |                |                |                |                |                |                |
|------------------------|----------------|----------------|----------------|----------------|----------------|----------------|----------------|----------------|
|                        | B <sub>1</sub> | B <sub>2</sub> | P <sub>1</sub> | P <sub>2</sub> | P <sub>3</sub> | P <sub>4</sub> | P <sub>5</sub> | P <sub>6</sub> |
| x                      | 0.495          | 0.973          | 0.502          | 0.226          | 0.156          | 0.634          | 0.613          | 0.892          |
| y                      | 0.262          | 0.762          | 0.763          | 0.263          | 0.262          | 0.762          | 0.263          | 0.763          |
| z                      | 0.117          | 0.111          | 0.000          | 0.005          | 0.093          | 0.085          | 0.193          | 0.189          |

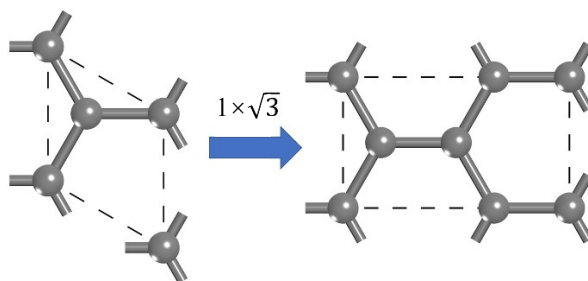

**Fig. S1.** The redefined monolayer GR.

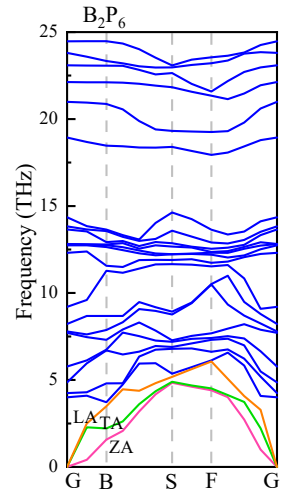

**Fig. S2.** Phonon dispersion curves of Janus  $B_2P_6$  monolayer.

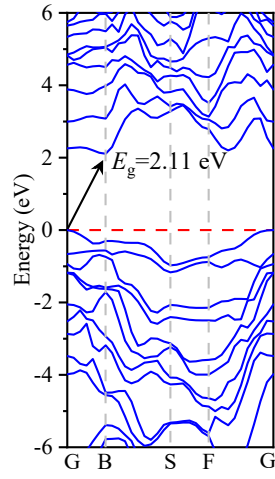

**Fig. S3.** Energy band structure of monolayer Janus B<sub>2</sub>P<sub>6</sub> using hybrid functional HSE06.

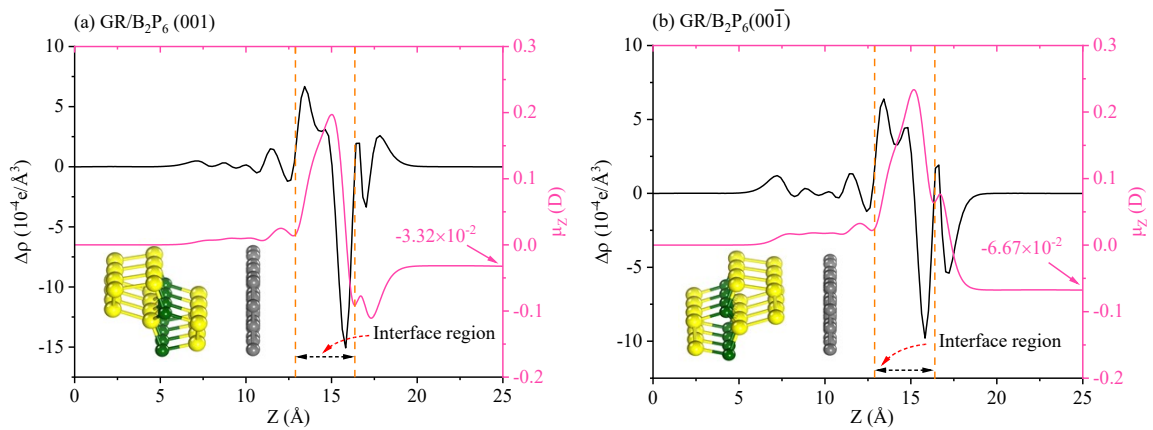

**Fig. S4.** Planar-averaged charge density differences (black line) and dipole moments (pink line) of (a) GR/B<sub>2</sub>P<sub>6</sub>(001) and (b) GR/B<sub>2</sub>P<sub>6</sub>(00 $\bar{1}$ ) heterostructures.

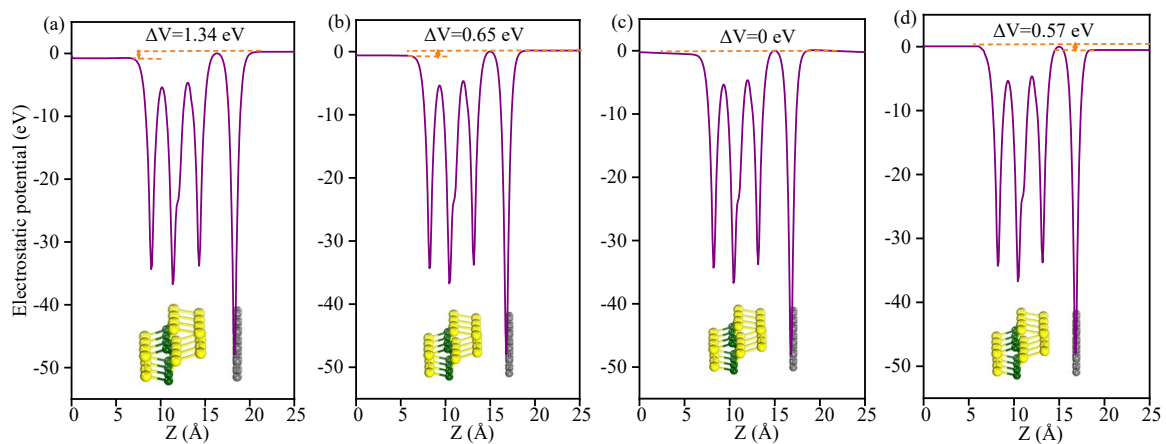

**Fig. S5.** The electrostatic potential for GR/B<sub>2</sub>P<sub>6</sub>(00Error!) heterostructure with various external electric field. (a)–(d) represent the external electric field 0, -0.025, -0.050 and -0.075 V·Å<sup>-1</sup>.
